# Supplementary material for: Exactly regulated copper catalysts exploiting isolated photoelectrochemical reduction of cuprous oxides and random mesh-structured TiO2 for enhanced photoelectrochemical CO2 conversion
Source: Royal Society of Chemistry journal article supplement (doi:10.1039/d4ta01486c), 2024-01-01
Supplement: d4ta01486c1.pdf [file d4ta01486c1.pdf]

## Supplementary information

### **Exactly regulated copper catalysts exploiting isolated photoelectrochemical reduction of cuprous oxides and random mesh-structured TiO<sub>2</sub> for enhanced photoelectrochemical CO<sub>2</sub> conversion**

*Shin Young Oh<sup>1,a</sup>, Dong Su Kim<sup>1,a,b</sup>, Hak Hyeon Lee<sup>a</sup>, Kun Woong Lee<sup>b</sup>, Ji Hoon Choi<sup>a</sup>, Won Seok Yang<sup>a</sup>, Young Su Choi<sup>a</sup>, Dong Wook Kim<sup>a</sup>, Jee Won Byeon<sup>a</sup>, Ho Seong Lee<sup>c</sup>, and Hyung Koun Cho<sup>\*,a,b</sup>*

<sup>a</sup> School of Advanced Materials Science and Engineering, Sungkyunkwan University, 2066, Seobu-ro, Jangan-gu, Suwon-si, Gyeonggi-do, 16419, Republic of Korea

<sup>b</sup> Research Center for Advanced Materials Technology, Sungkyunkwan University (SKKU) 2066 Seobu-ro, Jangan-gu, Suwon, Gyeonggi-do, 16419, Republic of Korea

<sup>c</sup> Department of Materials Science and Metallurgical Engineering, Kyungpook National University, 80, Daehak-ro, Buk-gu, Daegu, 41566 Korea

<sup>1</sup> Shin Young Oh and Dong Su Kim contributed equally to this work

\*Corresponding author. Tel.: +82 31 290 7364

E-mail: [chohk@skku.edu](mailto:chohk@skku.edu)

## **Experimental Section**

### ***Cu<sub>2</sub>O thin film using electrodeposition:***

The substrate was a 180 nm ITO ( $10\text{-}15\ \Omega\ \text{sq.}^{-1}$ ) conductive film with glass. On top of this, a Cu<sub>2</sub>O layer was formed in an area of only 20 mm × 30 mm by taping. Before electrodeposition, the ITO was cleaned with acetone, ethanol, and distilled water for 20 min each via sonication. Cu<sub>2</sub>O was prepared via cathodic electrodeposition using a three-electrode system consisting of a bilayer including a seed layer. Ag/AgCl (saturated 3 M KCl) and Pt mesh (2.5 cm × 2.5 cm) were used as the reference and counter electrodes, respectively. A seed layer (Cu<sub>2</sub>O:Sb) of 200 nm thickness was preferentially formed. The chemical solution was prepared using 0.4 M copper sulfate (CuSO<sub>4</sub>, Junsei, >98%) and 3 M lactic acid solution (C<sub>3</sub>H<sub>6</sub>O<sub>3</sub>, 85% aqueous solution) in distilled water (18 Ω) and adjusted to pH 10 using 4 M sodium hydroxide (NaOH, Sigma-Aldrich) at 60 °C. Then, 3 mM antimony sulfate (Sb<sub>2</sub>(SO<sub>4</sub>)<sub>3</sub>, Sigma-Aldrich, >98%) was doped to form a seed layer. Electrodeposition was performed at -0.5 V vs. Ag/AgCl until reaching  $-0.16\ \text{C cm}^{-2}$ . Then, the undoped Cu<sub>2</sub>O was formed on the seed layer at pH 11, -0.5 V vs. Ag/AgCl until reaching  $-1.5\ \text{C cm}^{-2}$ .

### ***Atomic layer deposition of TiO<sub>2</sub>:***

TiO<sub>2</sub>, an RM TiO<sub>2</sub> protective layer, was deposited via atomic layer deposition (ALD). The precursor consists of tetrakis (dimethylamino)titanium in a 75 °C chamber and H<sub>2</sub>O as an oxygen source at room temperature. Ti Precursor 0.3 s pulse, Oxygen Precursor 0.1 s pulse, and 20 s pause were configured as one cycle. To deposit 2.5 nm TiO<sub>2</sub>, 40 cycles were performed under an Ar flow of 800 sccm, 150 °C. In the case of 10 nm TiO<sub>2</sub>, the same method was used for 160 cycles.

### ***Formation of Cu catalyst:***

The Cu catalyst made on Cu<sub>2</sub>O is made from each of HER and CO<sub>2</sub>RR solutions and is formed electrochemically using a three-electrode system. Each solution was run under the same conditions at pH 7. 0 V vs. RHE was applied continuously to form the Cu catalyst.

### ***(Photo-)electrochemical measurement:***

The PEC CO<sub>2</sub>RR experiments were conducted in a saturated 0.5 M KHCO<sub>3</sub> solution (pH 6.8) using an H-type cell. The three-electrode system consisted of a working (as-prepared photocathode sample), reference (saturated 4 M KCl Ag/AgCl), and counter electrode (Pt mesh) and was characterized with the Princeton Applied Research Versa STAT 4 system under a 150 W xenon lamp calibrated with an AM 1.5 Filter. Linear scan voltammetry (LSV) and chronoamperometry (CA) were performed under photo on/off and chopped conditions.

### ***Characterization of photocathodes:***

Field-emission scanning electron microscopy (SEM; JSM-7600F, JEOL) and transmission electron microscopy (TEM; JEM-2100F, JEOL) were used to analyze the morphology and structure of the Cu<sub>2</sub>O-based photocathodes. Patterns were obtained by X-ray diffraction (XRD; Bruker AXSD8 Discover with a Cu K $\alpha$  radiation source). The optical characteristics of the film samples were analyzed using an ultraviolet-visible (UV-Vis) spectrophotometer (Cary 5000, Agilent Technologies). Surface chemical variations were confirmed using X-ray photoelectron

spectroscopy (XPS, NEXSA, Thermo Fisher Scientific). Copper ion extraction was detected using an inductively coupled plasma-optical emission spectrometer (ICP-OES; Agilent 5100, PerkinElmer AVIO). Time-resolved photoluminescence (TRPL) measurements were conducted using an inverted-type scanning confocal microscope with a 40× objective and 375 nm laser (TRPL, MicroTime-200, Picoquant).

***Product analysis:***

Hydrogen and Carbon monoxide were detected by gas chromatography (GC, 7890B, Agilent, with 9 ft 1/8 2 mm Molsieve 5A 80/100 UM columns and 6 ft 1/8 2 mm Porapak Q 80/100 SS columns) under 1-sun illumination. H-type cells isolated through a membrane were used. Quantitative analysis of the products was conducted using standard gas.

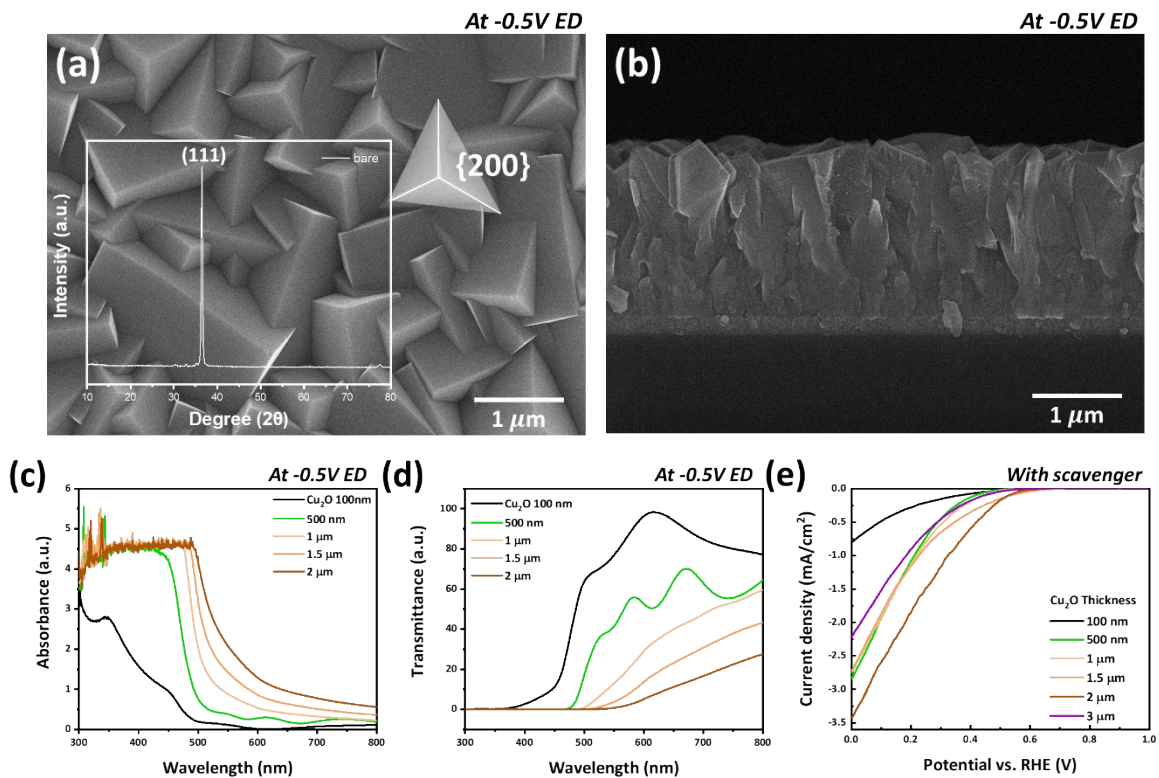

**Fig. S1** Properties of electrodeposited  $\text{Cu}_2\text{O}$ . (a) X-Ray diffractometer (XRD) and scanning electron microscopy (SEM) top image of bare  $\text{Cu}_2\text{O}$  and (b) SEM cross image. (c) Absorbance and (d) transmittance analyses. (e) LSV profile of the  $\text{CO}_2$  electrolyte with a scavenger for thicknesses of 100 nm, 500 nm, 1  $\mu\text{m}$ , 1.5  $\mu\text{m}$ , 2  $\mu\text{m}$ , 3  $\mu\text{m}$  (-0.5 V vs. Ag/AgCl).

**(a) CO<sub>2</sub> purging saturation time in KHCO<sub>3</sub> (60 min)**

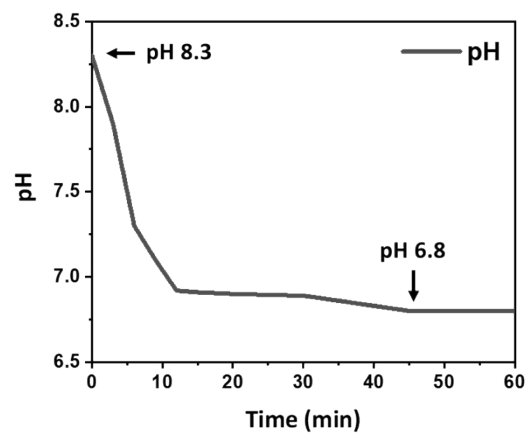

**Fig. S2** (a) Change in the pH of 0.5 M saturated KHCO<sub>3</sub> solution as a function of CO<sub>2</sub> gas purging time.

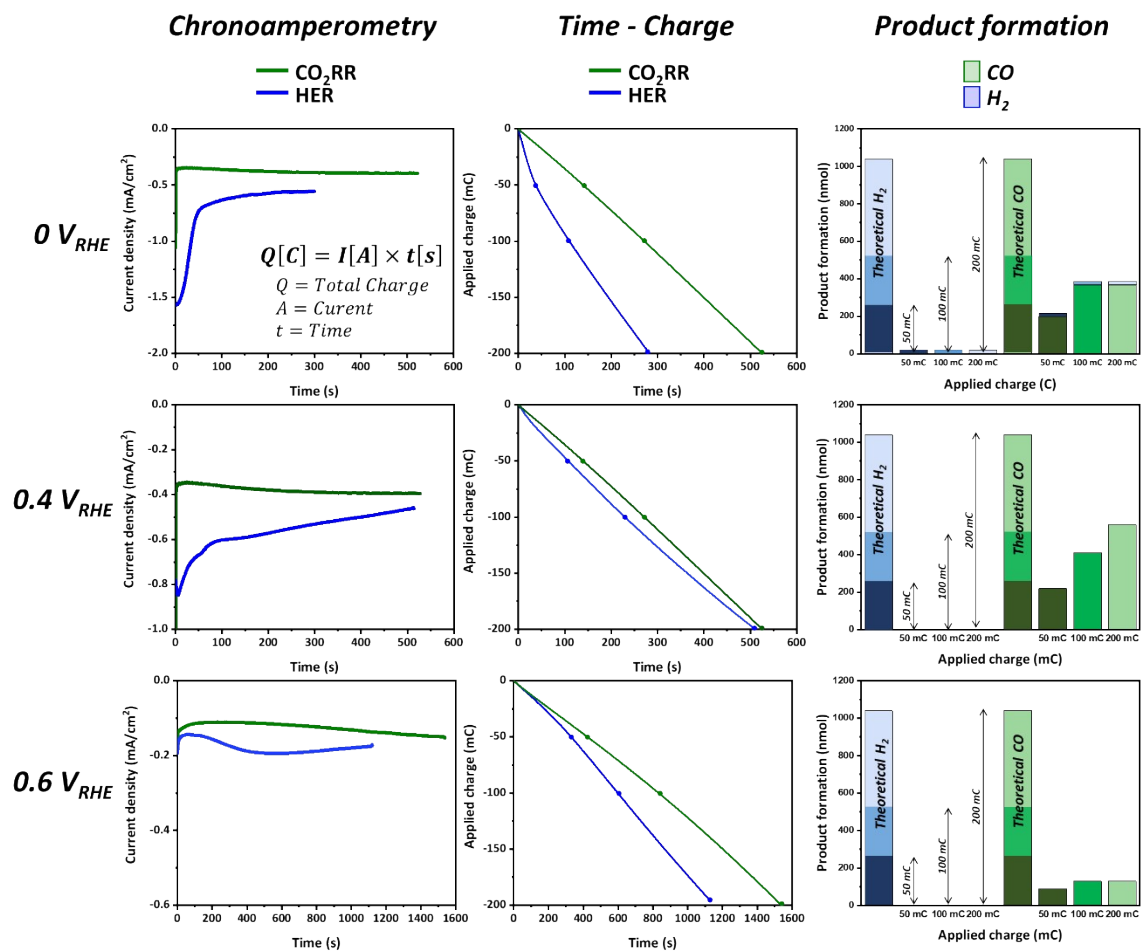

**Fig. S3** Chronoamperometry (left side), Q-t (middle side), and product formation (right side) according to potential (0 V, 0.4 V, 0.6 V<sub>RHE</sub>). Blue: HER solution, Green: CO<sub>2</sub>RR solution.

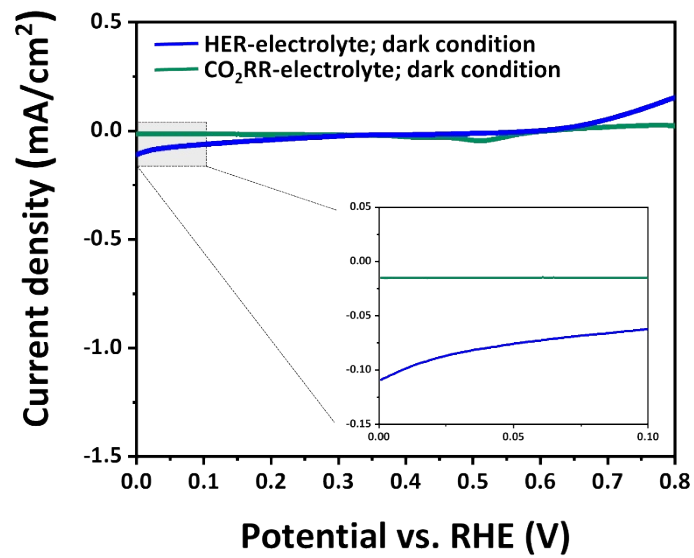

**Fig. S4** Linear sweep voltammetry (LSV) curve of Cu<sub>2</sub>O in 0.5 M KHCO<sub>3</sub> under dark conditions with a scan rate of 10 mV s<sup>-1</sup>. In HER solution (blue line) and CO<sub>2</sub>RR solution (Green line). The inset graph is an enlargement of the gray box area.

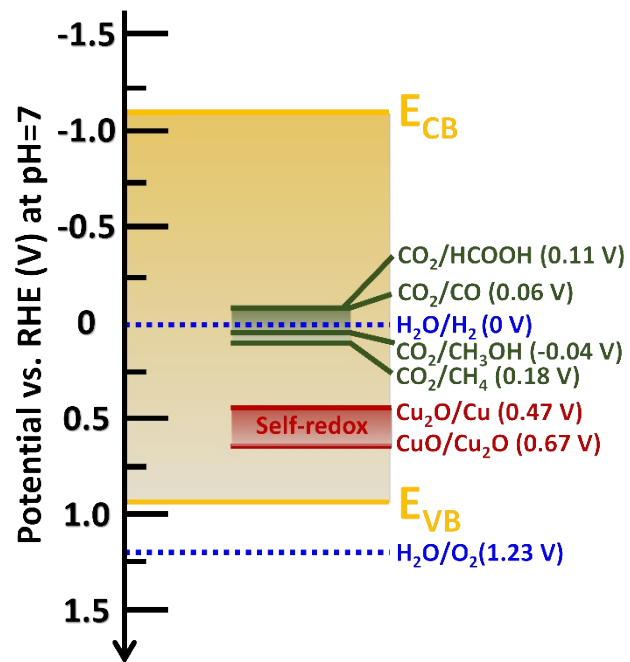

**Fig. S5** Schematic of Cu<sub>2</sub>O band level at pH 7, including water splitting (blue), CO<sub>2</sub> reduction reaction (green), and self-redox reaction (red) state.



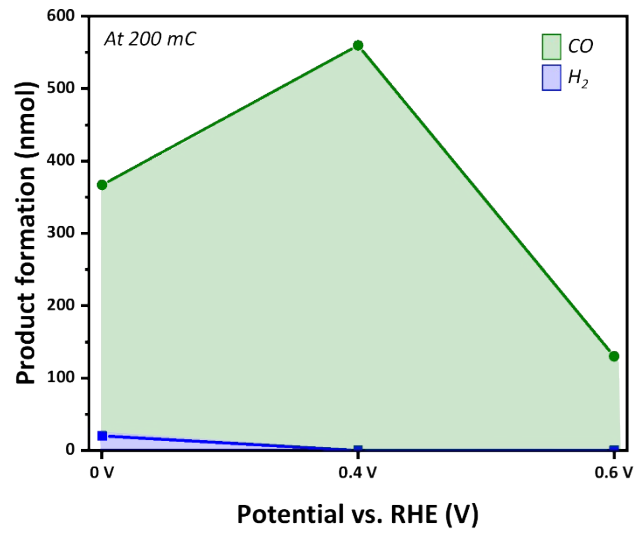

**Fig. S6** Amount of H<sub>2</sub> in HER solution (blue) and CO in CO<sub>2</sub>RR solution (green) according to potential (0 V<sub>RHE</sub>, 0.4 V<sub>RHE</sub>, 0.6 V<sub>RHE</sub>) up to 200 mC.

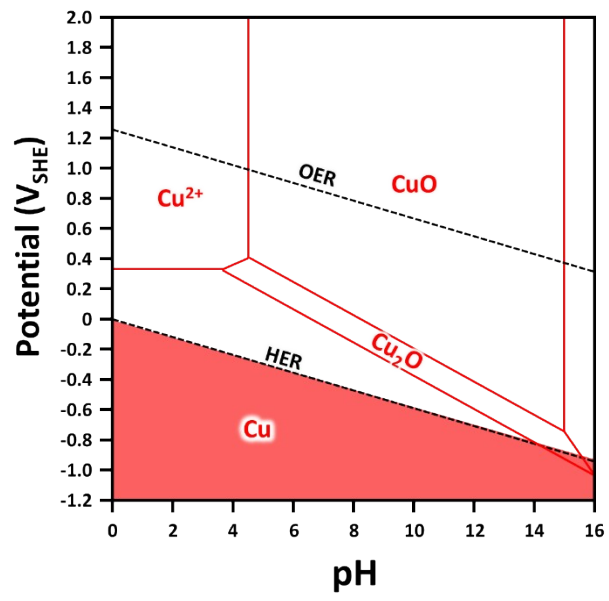

Fig. S7 Pourbaix diagram of Cu-based materials.

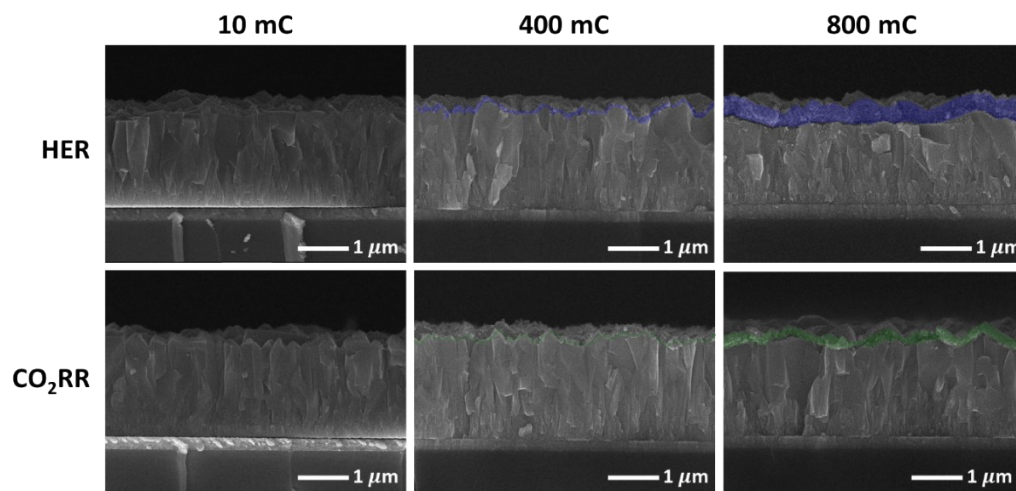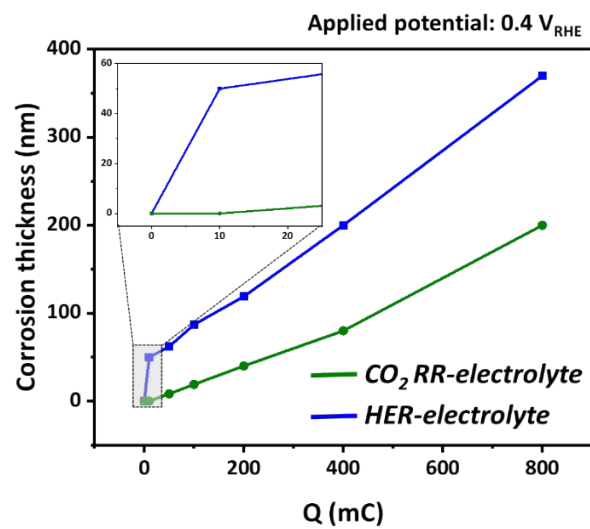

**Fig. S8** Cu metal layer formed by photocorrosion on the surface depending on the amount of charge in HER (blue) and CO<sub>2</sub>RR (green) solution (0.4 V<sub>RHE</sub>). The inset graph is an enlargement of the gray box area.

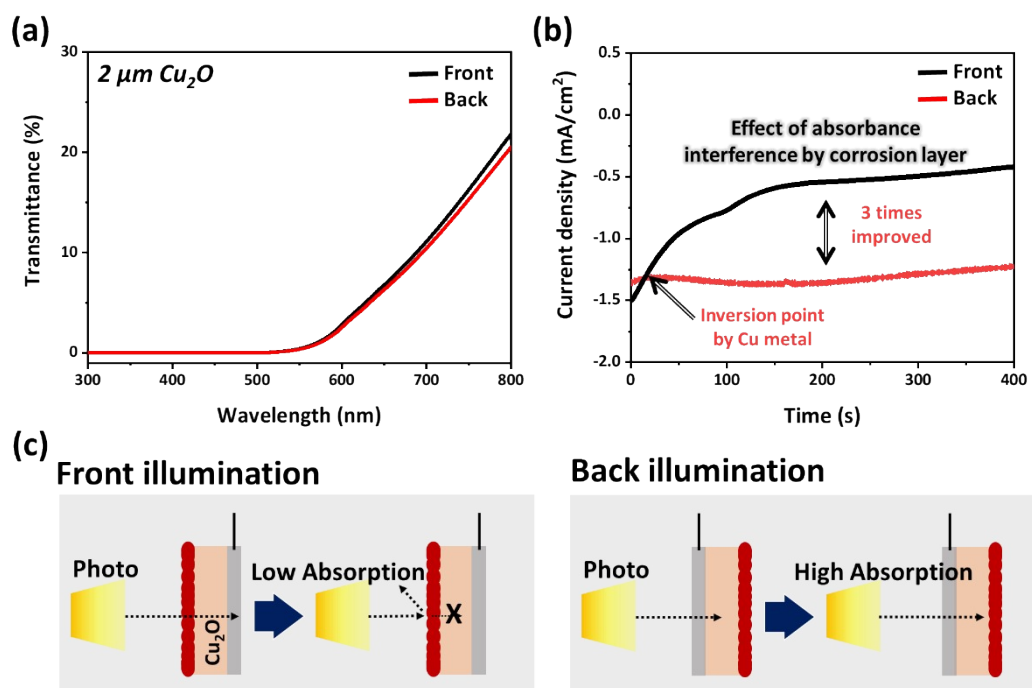

**Fig. S9** (a) UV/VIS spectrophotometer and (b) I-t curve of back and front illumination. (c) Schematic image of front and back illumination.

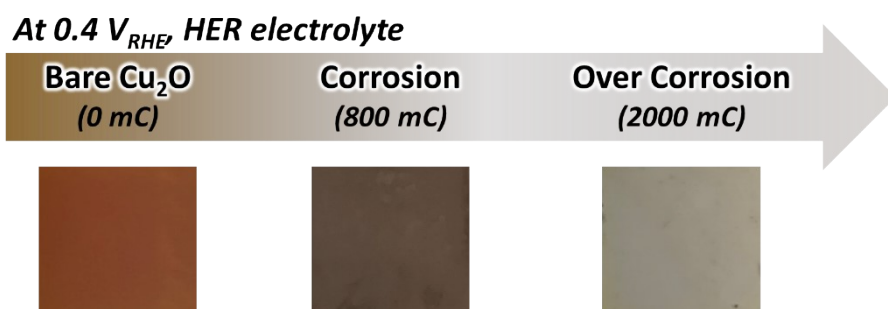

**Fig. S10** Surface change of  $Cu_2O$  by continuous photocorrosion at 0, 800, and 2000 mC in HER solution ( $0.4 V_{RHE}$ )

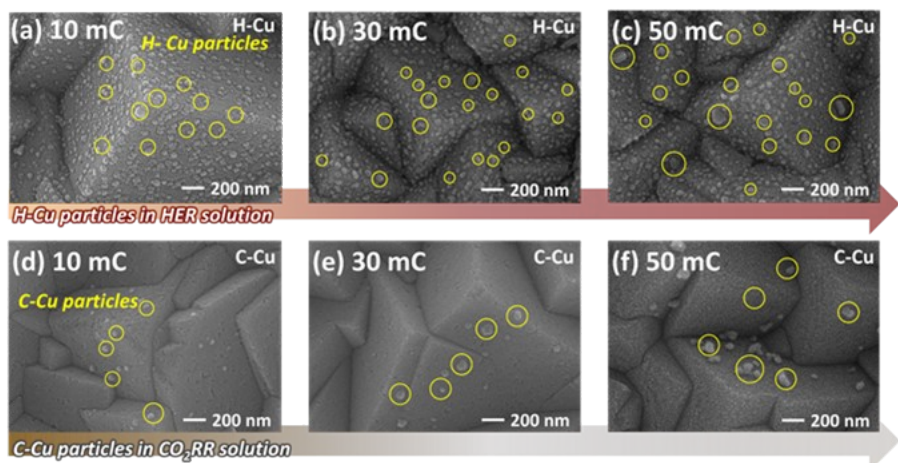

**Fig. S11** Artificially controlled Cu-particles in (a) HER solution and (b) CO<sub>2</sub>RR solution at 0 V<sub>RHE</sub>.

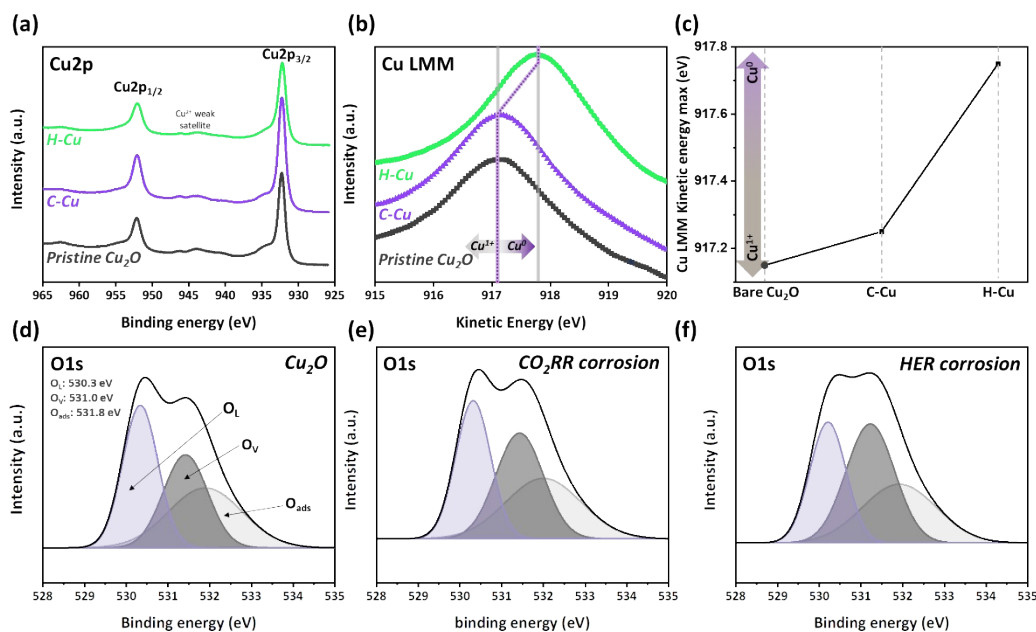

**Fig. S12** X-ray photoemission spectroscopy (XPS) spectra of Cu2p and O1s (Al  $K\alpha=1486.6$  eV). (a) Cu2p survey of pristine  $\text{Cu}_2\text{O}$ , C-Cu, and H-Cu. Cu 2p<sub>3/2</sub> consists of  $\text{Cu}^0 = 932.61$ ,  $\text{Cu}^+ = 932.28$  eV, and  $\text{Cu}^{2+} = 934.7 \pm 0.1$  eV. (b) Cu LMM Auger spectra of pristine  $\text{Cu}_2\text{O}$ , C-Cu, and H-Cu. (c) Graph indicating the movement of the Cu LMM peak maximum. (d-f) O1s survey of pristine  $\text{Cu}_2\text{O}$ , C-Cu, and H-Cu.  $\text{O}_L$ =Lattice Oxygen,  $\text{O}_V$ =Oxygen vacancy,  $\text{O}_{adh}$ =Adhesion oxygen (chemisorbed oxygen species).

XPS analysis was performed to study the copper and oxidation state of the  $\text{Cu}_2\text{O}$  surface after PEC measurement at 5 mC in the HER and  $\text{CO}_2$  electrolytes (**Fig. S11a-f**). From the Cu2p spectra (**Fig S11a and S12**), it can clearly be seen that the three samples show typical spectra related to the  $\text{Cu}^+$  oxidation state, with a very small and weak satellite corresponding to the  $\text{Cu}^{2+}$  state. The BE data used the C 1s (285.5 eV) peaks as a reference. The main peak of Cu 2p<sub>3/2</sub> consisted of  $\text{Cu}^0$  at 932.61,  $\text{Cu}^+$  at 932.28 eV, and  $\text{Cu}^{2+}$  at  $934.7 \pm 0.1$  eV. However, the peak at 932.3 eV can be assigned to either  $\text{Cu}^+$  or  $\text{Cu}^0$  because their binding energies almost overlap in the spectrum of Cu 2p<sub>3/2</sub>.<sup>1,2</sup> To further confirm this attribution, we also examined the CuL3M4.5M4.5 Auger peaks, from which the modified Auger parameter can be calculated (**Fig S11b and S11c**). This parameter also allowed us to distinguish between  $\text{Cu}^+$  and  $\text{Cu}^0$ , which show almost the same chemical shift in Cu2p. Based on the pristine  $\text{Cu}_2\text{O}$  peak,  $\text{Cu}_2\text{O}$  with C-Cu was slightly shifted, but in the case of  $\text{Cu}_2\text{O}$  with H-Cu, the maximum peak shifted by 0.6 eV. Here, greater chemical shifts were observed for Cu LMM than for Cu2p. The presence of  $\text{Cu}^0$  could be due to the partial photocorrosion of  $\text{Cu}_2\text{O}$  during  $\text{CO}_2\text{RR}$ . To further distinguish  $\text{Cu}^+$  from  $\text{Cu}^0$ , it was necessary to split the O 1s spectrum. The presence of  $\text{Cu}_2\text{O}$  was also confirmed by the O 1s XPS spectrum (**Fig S11d-f**), in which the peak located at 530.6 eV is consistent with the value reported for O–Cu in  $\text{Cu}_2\text{O}$ . In addition, in **Fig S11f**, the increase in O vacancies of  $\text{Cu}_2\text{O}$  containing H-Cu is

expected to originate from the site where Cu metal is formed after oxygen is desorbed using the surface of Cu<sub>2</sub>O as a seed.

## References

1. J. J. Teo, Y. Chang and H. C. Zeng, *Langmuir*, 2006, **22**, 7369–7377.
2. J. Wang, C. Li, Y. Zhu, J. A. Boscoboinik and G. Zhou, *J. Phys. Chem. Lett.*, 2022, **13**, 5597–5604.



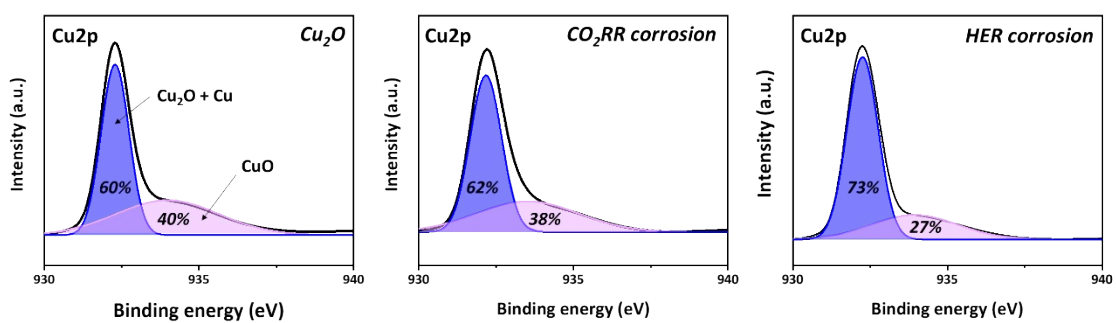

**Fig. S13** XPS Cu2p HR survey. (a)  $\text{Cu}_2\text{O}$ . (b)  $\text{Cu}_2\text{O}/\text{C-Cu}$ . (c)  $\text{Cu}_2\text{O}/\text{H-Cu}$ . The purple area indicates the  $\text{Cu}_2\text{O}$  and Cu phases, and pink indicates the CuO phase.

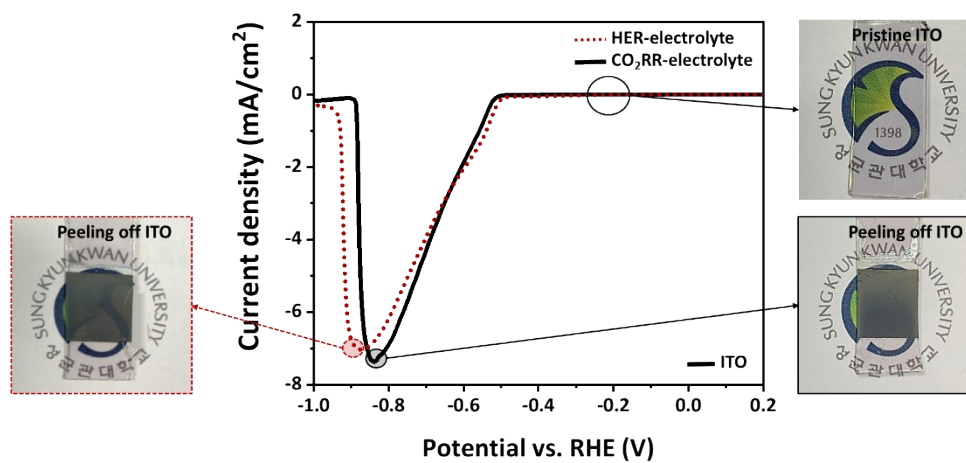

**Fig. S14** LSV curves of ITO substrate in HER, CO<sub>2</sub>RR solution under illuminated conditions, and electrode condition images at each indicated part.

## EC (Electrochemical)

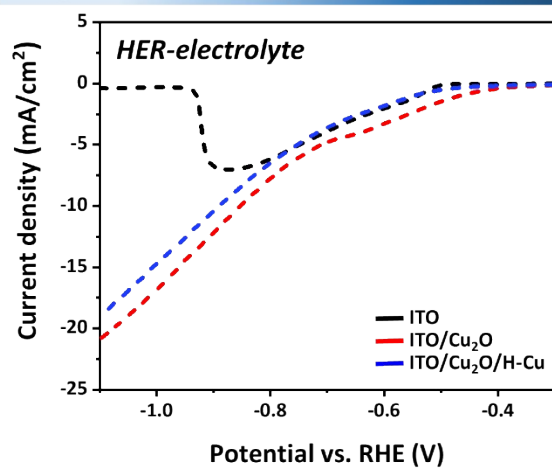

**Fig. S15** LSV curves for ITO, ITO/Cu<sub>2</sub>O, and ITO/Cu<sub>2</sub>O/H-Cu in HER solution under no photo illumination.

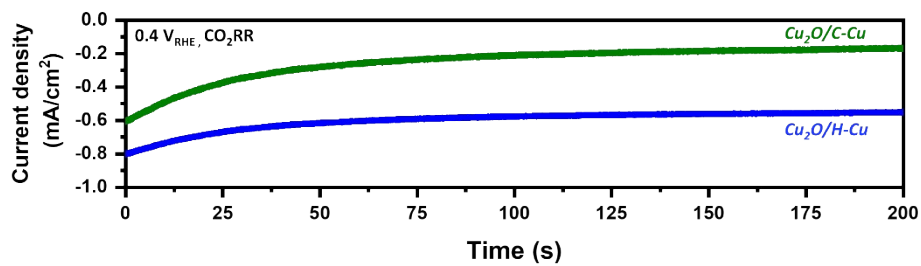

**Fig. S16** Long-term stability of  $\text{Cu}_2\text{O}/\text{H-Cu}$  and  $\text{Cu}_2\text{O}/\text{C-Cu}$  photoelectrodes in 0.5 M  $\text{KHCO}_3$  ( $0.4 V_{\text{RHE}}$ ).

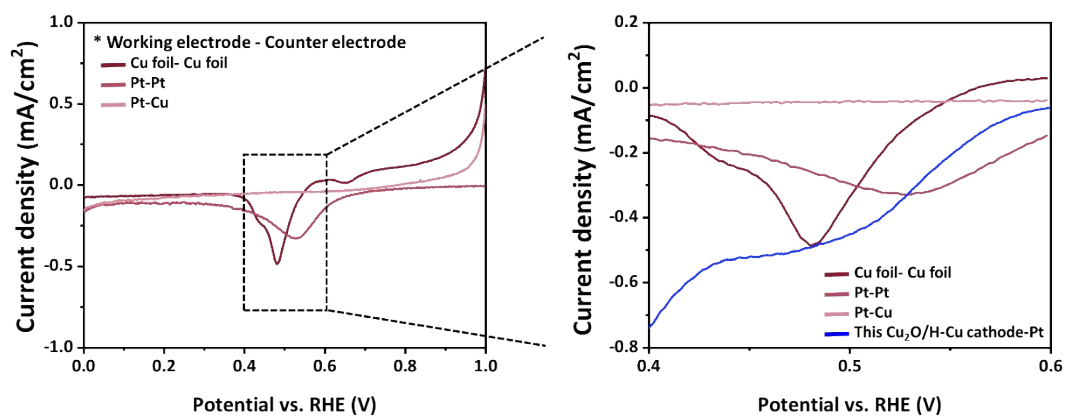

**Fig. S17** Various electrodes conforming to overpotential in 0.5 M KHCO<sub>3</sub> and compared to Cu<sub>2</sub>O/H-Cu cathode.

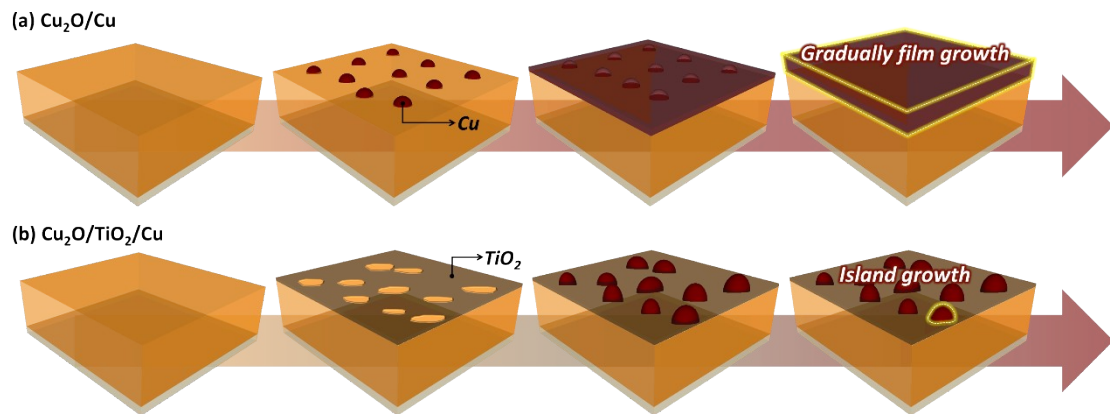

**Fig. S18** Schematic image of (a)  $\text{Cu}_2\text{O}/\text{Cu}$ , Cu film formation as corrosion progresses and (b)  $\text{Cu}_2\text{O}/\text{TiO}_2/\text{Cu}$  formation of island-grown Cu through (UT)  $\text{TiO}_2$ .

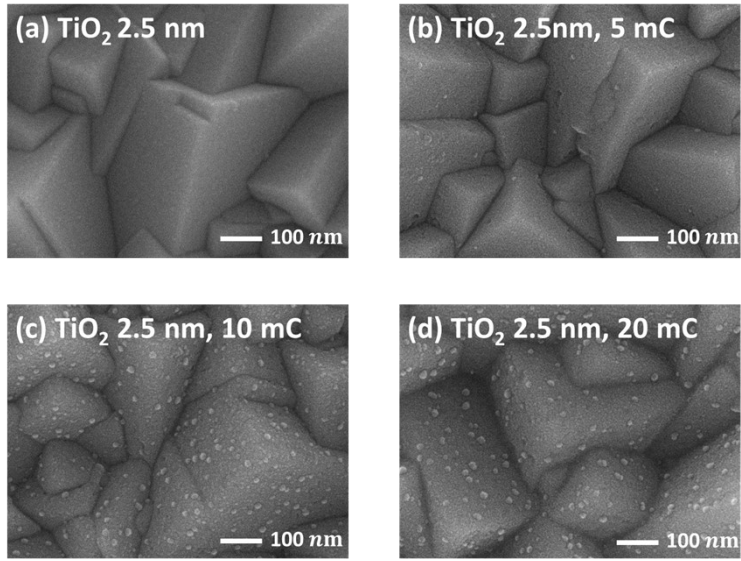

**Fig. S19** H-Cu formation on 2.5 nm TiO<sub>2</sub> according to applied charge (5, 10, 20 mC).

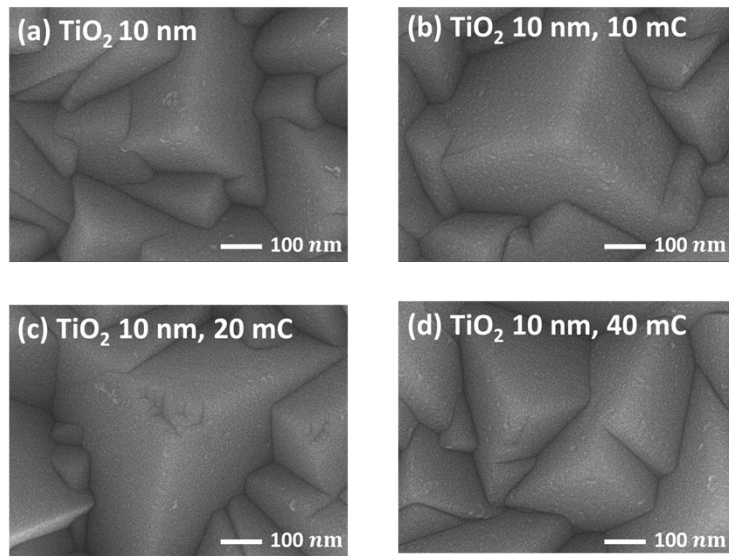

**Fig. S20** H-Cu formation on 10 nm TiO<sub>2</sub> according to applied charge (10, 20, 40 mC).



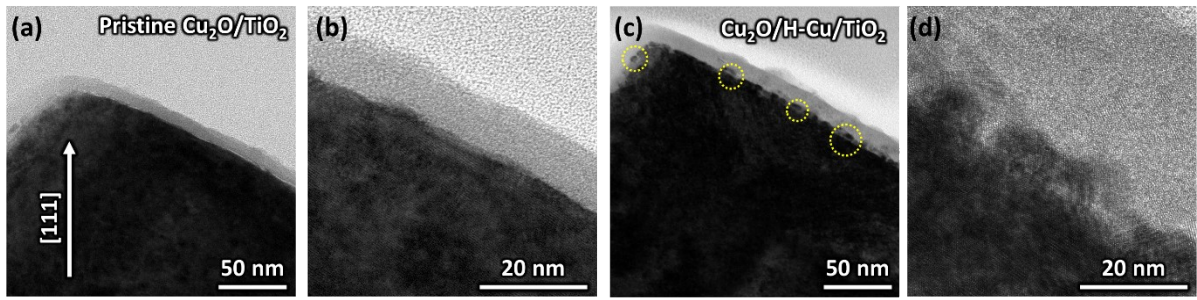

Fig. S21 TEM images of cathodes. (a, b)  $\text{Cu}_2\text{O}/\text{TiO}_2$ . (c, d)  $\text{Cu}_2\text{O}/\text{H-Cu}/\text{TiO}_2$ .

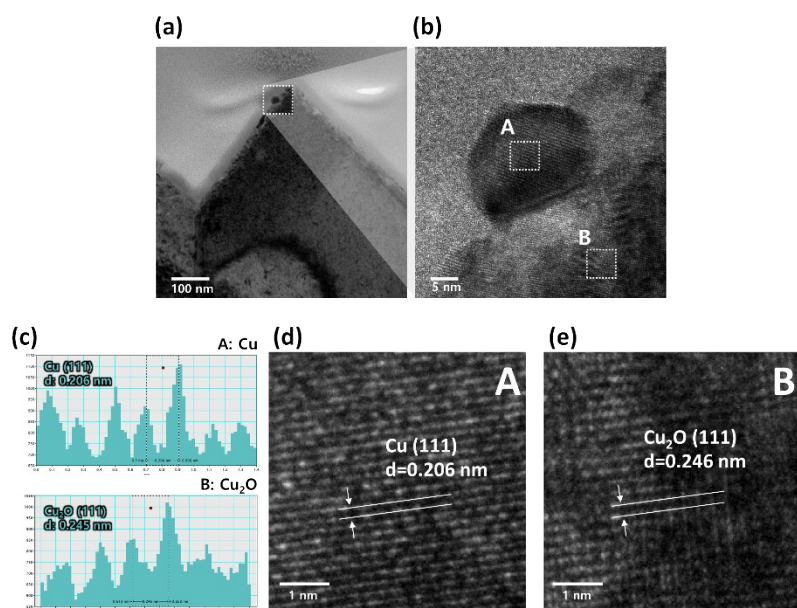

Fig. S22 HRTEM images of  $\text{Cu}_2\text{O}/\text{C-Cu}$  illustrating the formation of low-density metal catalysts over 20 nm in size.

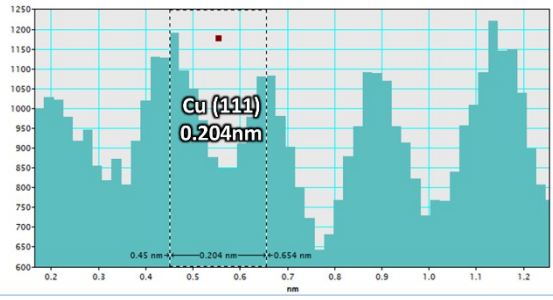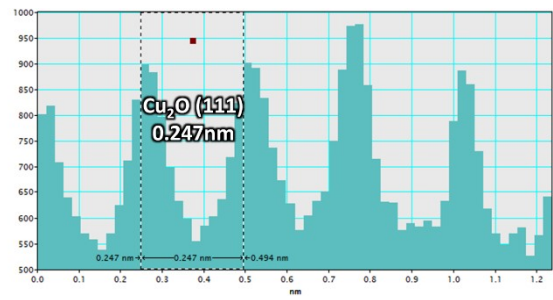

**Fig. S23** Atomic distances in transmission electron microscopy (TEM) measurement results for Cu and Cu<sub>2</sub>O.

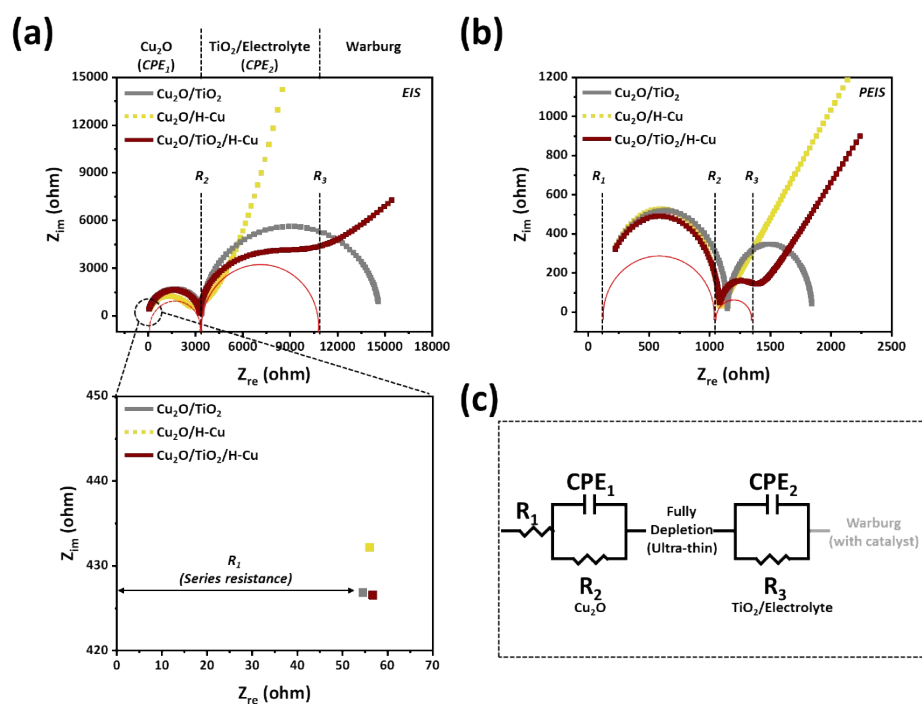

**Fig. S24** Electrochemical analysis of  $\text{Cu}_2\text{O}/\text{TiO}_2$  (grey),  $\text{Cu}_2\text{O}/\text{H-Cu}$  (yellow), and  $\text{Cu}_2\text{O}/\text{TiO}_2/\text{H-Cu}$  (red) at a dynamic potential (AC signal) of  $0.4 V_{\text{RHE}}$ , a frequency ranging from 1 Hz to 1000 kHz, and an amplitude of 10 mV in 0.5 M  $\text{KHCO}_3$ ; (a) electrochemical impedance spectra under dark conditions, and (b) photoelectrochemical impedance spectra under AM 1.5G simulated sunlight ( $100 \text{ mW cm}^{-2}$ ). (c) In the equivalent circuit, the electrochemical impedance spectroscopy results were fitted using the Z-view software.

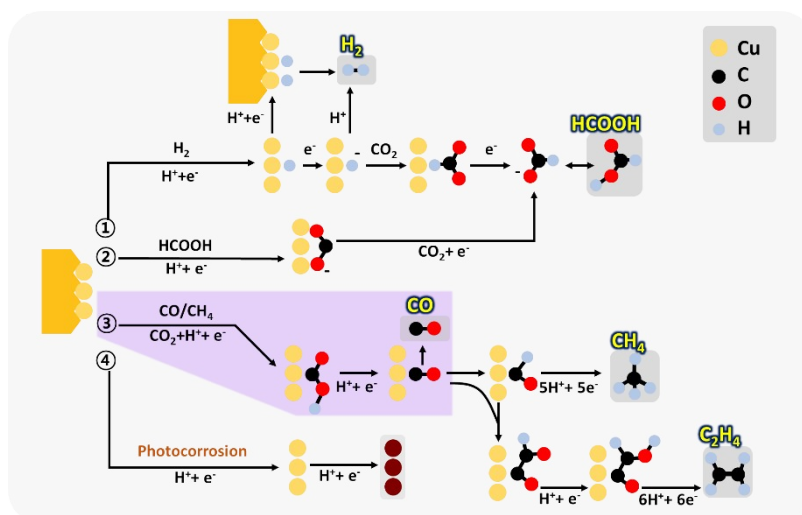

**Fig. S25** Reaction pathways for CO<sub>2</sub>RR toward different products of the Cu<sub>2</sub>O/RM-TiO<sub>2</sub>/H-Cu photocathode. This study highlights the dominant CO pathway during the photoelectrochemical CO<sub>2</sub> reduction reaction under illumination.

**Table. S1** Photoelectrochemical (PEC) performance table.

| Cell configuration<br>Catalyst                           | Electrolyte                                  | Product            | Current density<br>(mA/cm <sup>2</sup> ) at 0.4 V <sub>RHE</sub> | Ref.             |
|----------------------------------------------------------|----------------------------------------------|--------------------|------------------------------------------------------------------|------------------|
| <b>Cu</b>                                                | <b>0.5 M KHCO<sub>3</sub></b>                | <b>CO</b>          | <b>1.57</b>                                                      | <b>This work</b> |
| Cu <sub>2</sub> O NW/TiO <sub>2</sub> /Cu                | 0.3 M KHCO <sub>3</sub>                      | CH <sub>3</sub> OH | 1.1                                                              | [1]              |
| Cu <sub>2</sub> O/MOF-Cu <sub>3</sub> (BTC) <sub>2</sub> | 0.1 M acetonitrile                           | CO                 | -0.8 (-1.97 V <sub>FC/FC+</sub> )                                | [2]              |
| Cu foil/ Cu <sub>2</sub> O/CuO                           | 0.1 M KHCO <sub>3</sub>                      | CO, MeOH, Formic   | 0.3                                                              | [3]              |
| NiO/Cu                                                   | K <sub>2</sub> CO <sub>3</sub>               | HCOOH              | ~0.5                                                             | [4]              |
| Cu foil/ Cu NW                                           | 0.1 M KHCO <sub>3</sub>                      | CH <sub>4</sub>    | 1                                                                | [5]              |
| Cu <sub>2</sub> O/TiO <sub>2</sub>                       | MeCN, 0.1 M Bu <sub>4</sub> NPF <sub>6</sub> | CO                 | 0.23 (at 0.6 V <sub>RHE</sub> )                                  | [6]              |
| CuBi <sub>2</sub> O <sub>4</sub> /TiO <sub>2</sub>       | 0.1 M KHCO <sub>3</sub>                      | CO                 | 0.22 (at 0.6 V <sub>RHE</sub> )                                  | [7]              |

**References**

1. K. Lee, S. Lee, H. Cho, S. Jeong, W. D. Kim, S. Lee and D. C. Lee, *J. Energy Chem.*, 2018, **27**, 264–270.
2. X. Deng, R. Li, S. Wu, L. Wang, J. Hu, J. Ma, W. Jiang, N. Zhang, X. Zheng, C. Gao, L. Wang, Q. Zhang, J. Zhu and Y. Xiong, *J. Am. Chem. Soc.*, 2019, **141**, 10924–10929.
3. D. H. Won, C. H. Choi, J. Chung and S. I. Woo, *Appl. Catal. B Environ.*, 2014, **158–159**, 217–223.
4. J. S. Duchene, G. Tagliabue, A. J. Welch, X. Li, W. H. Cheng and H. A. Atwater, *Nano Lett.*, 2020, **20**, 2348–2358.
5. Q. Wang, Y. Zhang, Y. Liu, K. Wang, W. Qiu, L. Chen, W. Li and J. Li, *J. Electroanal. Chem.*, 2022, **912**, 116252.
6. M. Schreier, J. Luo, P. Gao, T. Moehl, M. T. Mayer and M. Grätzel, *J. Am. Chem. Soc.*, 2016, **138**, 1938–1946.
7. Y. Wang, H. Wang and T. He, *Chemosphere*, 2021, **264**, 128508.
